# Supplementary material for: Quantitative analysis of protein-protein interactions and post-translational modifications in rare immune populations
Source: PubMed Central journal article supplement (PMC5688095; doi:10.1038/s41467-017-01808-6), 2017-11-15
Supplement: 41467_2017_1808_MOESM1_ESM.pdf [file 41467_2017_1808_MOESM1_ESM.pdf]

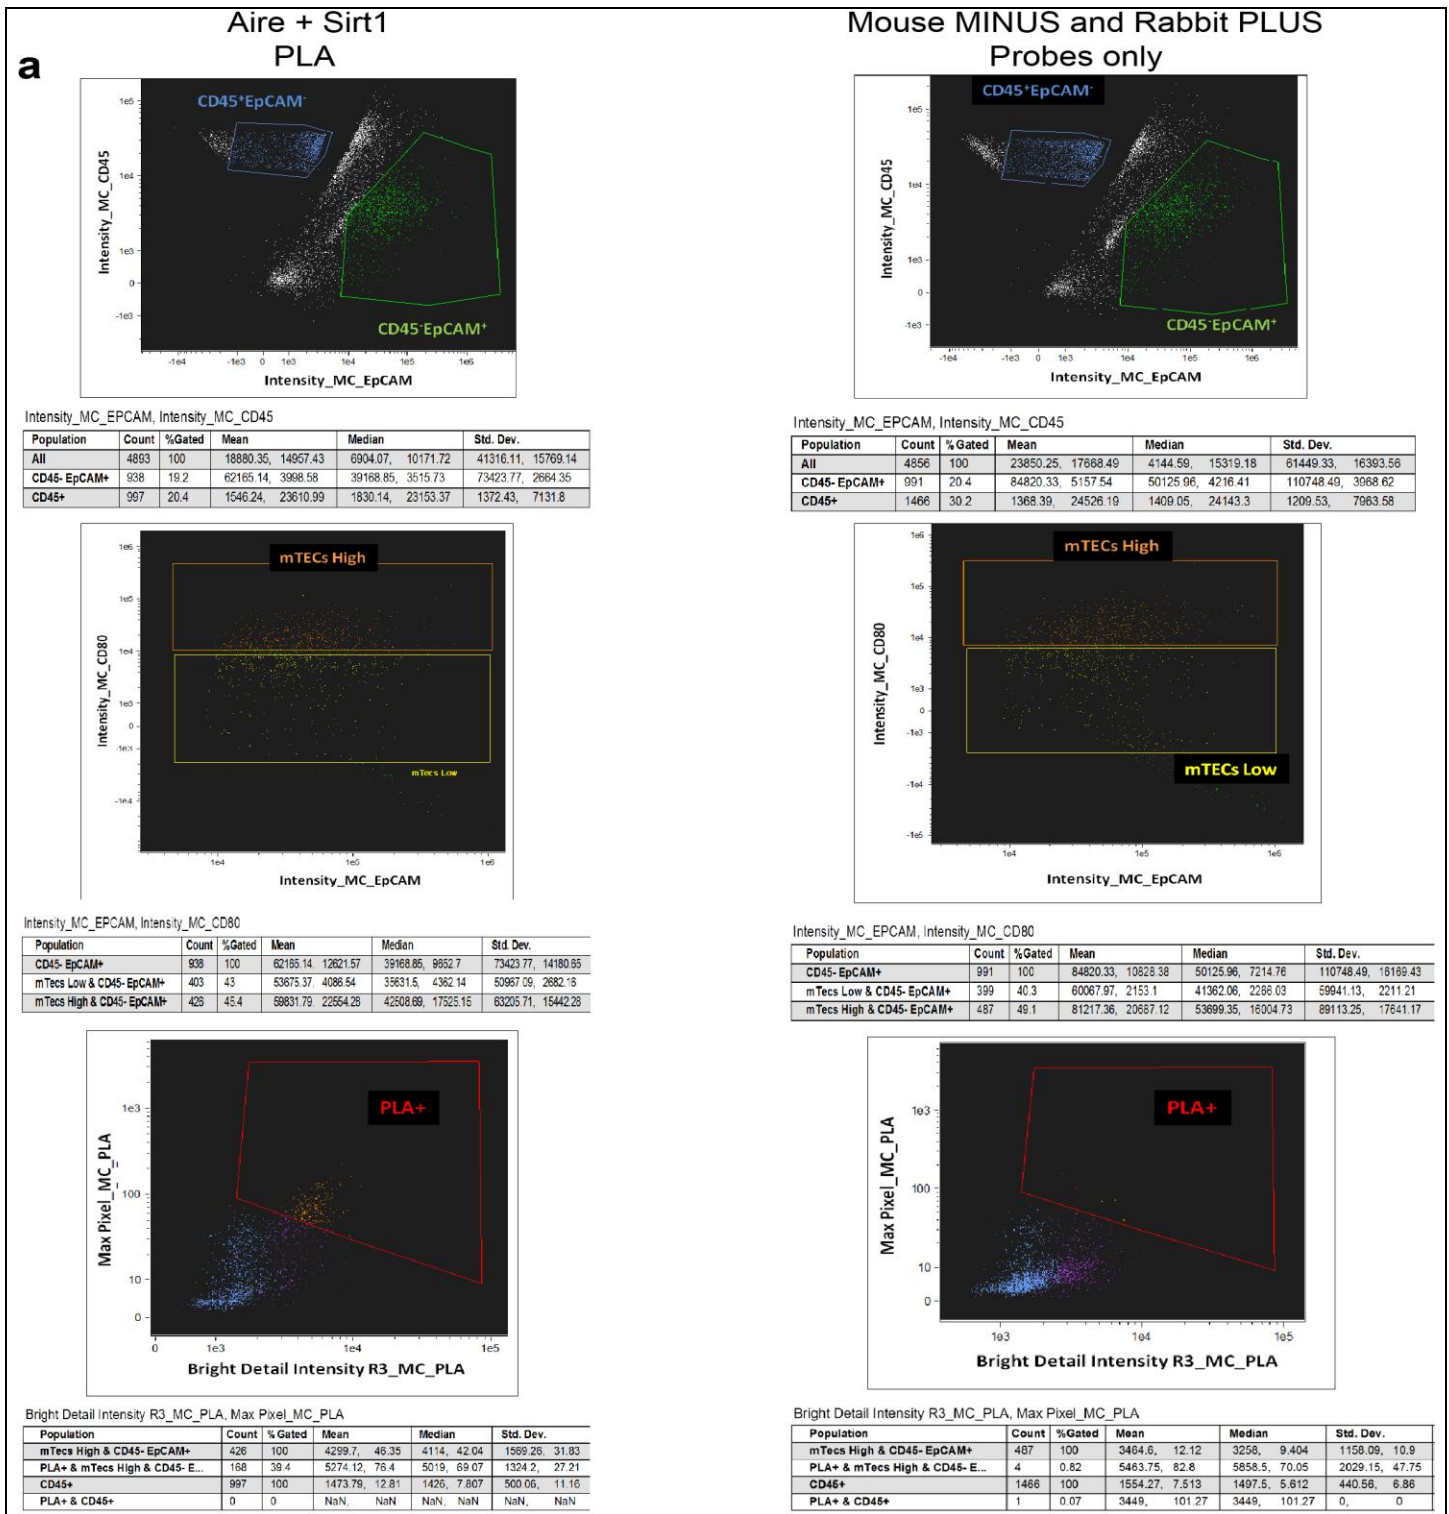

## Supplementary Figure 1

### PLIC analysis of Aire and Sirt1 interaction in mTECs

(a) Gating strategy for PLIC positive signal of Aire+Sirt1 interaction compared to probes only sample. Representative dot-plot graphs of WT and probes only samples of Aire+Sirt1 PLIC analysis (using the IDEAS 6.2 ImageStream software). Initial gating was done for CD45<sup>+</sup>Epcam<sup>-</sup> (CD45) and Epcam<sup>+</sup>CD45<sup>-</sup> (TECs) populations (upper panel); sub-gating for mTEC<sup>hi</sup> (CD80<sup>high</sup>) and mTEC<sup>lo</sup> (CD80<sup>low</sup>) populations (middle panel) and for PLIC<sup>+</sup> signal (PLA+, lower panel).

**b**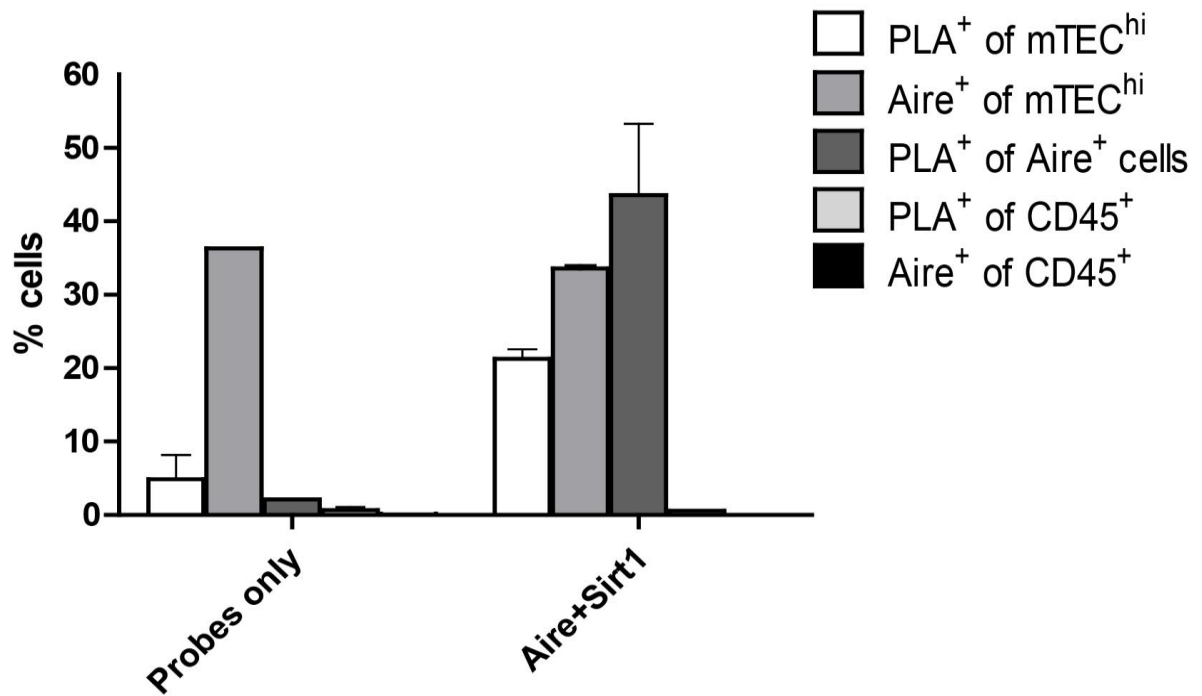**Supplementary Figure 1****PLIC analysis of Aire and Sirt1 interaction in mTECs**

(b) Quantitative analysis of Aire and Sirt1 interaction in the different sub populations, presented as percentage of positive cells for – PLA in mTEC<sup>hi</sup>, Aire in mTEC<sup>hi</sup>, PLA in Aire<sup>+</sup> (of mTEC<sup>hi</sup>), PLA in CD45<sup>+</sup> and Aire in CD45<sup>+</sup> cells, isolated from WT mice compared to probes background (Average of 2 independent experiments, n=2, s.e.m).

### Probes only

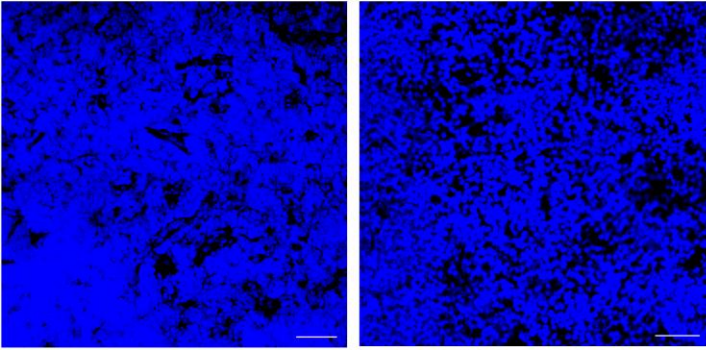

### Aire+Sirt1 PLA

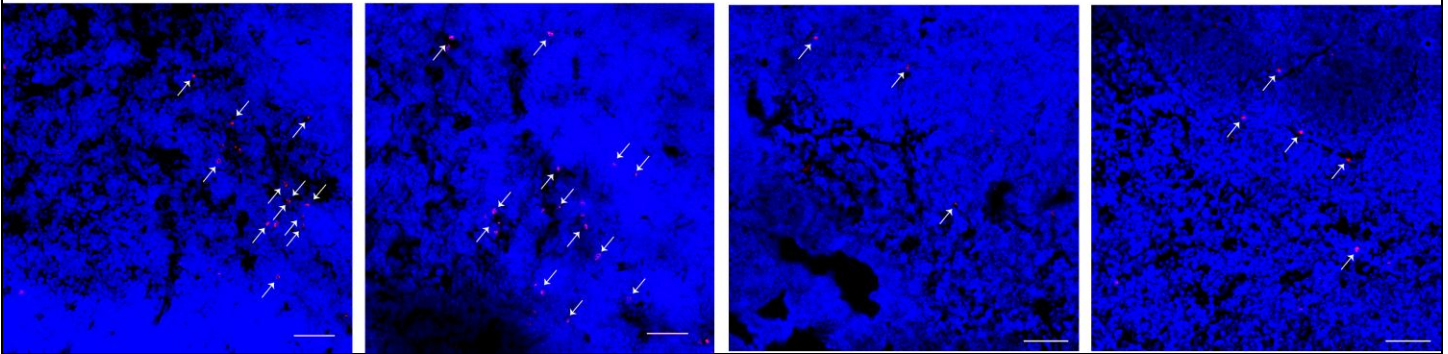

### Supplementary Figure 2

#### Aire and Sirt1 interaction detected by standard PLA and confocal microscopy

PLA probing Aire and Sirt1 interaction in WT thymic sections analyzed by confocal microscopy. The upper panel shows negative controls (NC), in which only PLA probes with no primary antibodies were used; the lower panel shows staining of Aire and Sirt1. Protein interaction appears as red dots in the medullary region (highlighted by white arrows). Nuclei were stained with DAPI. Scale bar 50 $\mu$ M.

### Aire KO

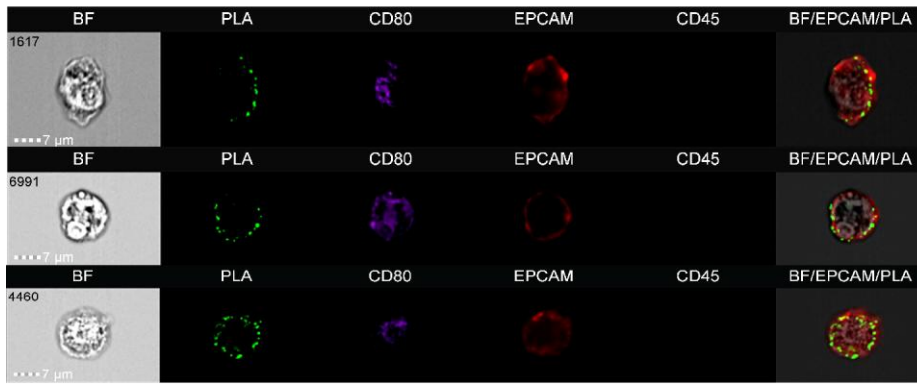

### Probes only

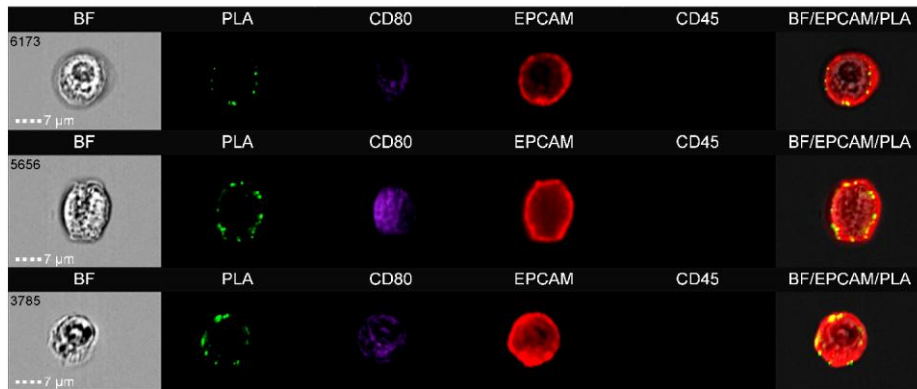

### Autofluorescent cells

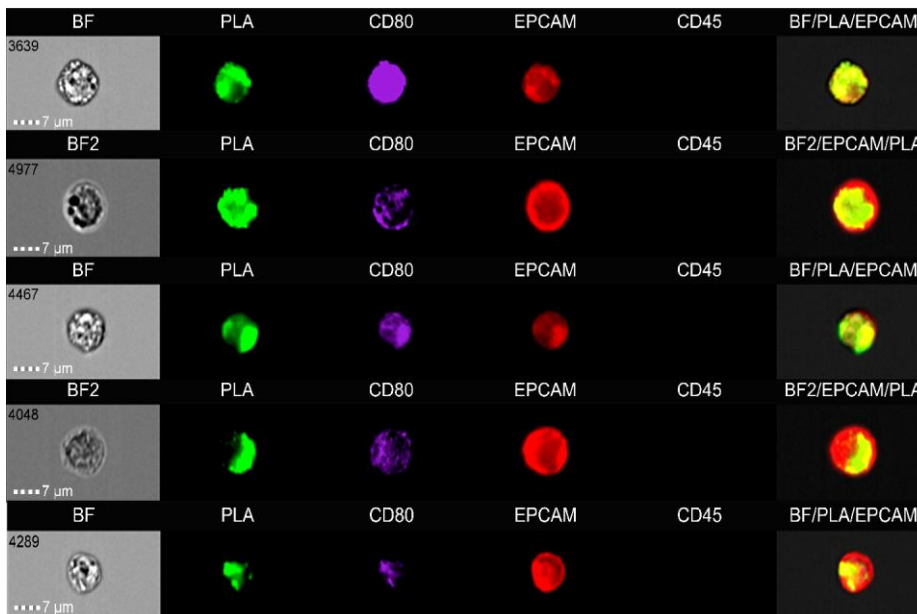

### Supplementary Figure 3

#### PLA false-positive signal caused by non-specific binding or cells autofluorescence

Representative images of PLA false-positive signal caused by probes non-specific membranal binding and cells autofluorescence in mTEC<sup>hi</sup> isolated from *Aire*<sup>-/-</sup> mice, or probes only sample (WT), prior to a corrected analysis gating. Images are presented as (left to right): bright field (BF), PLA (green), staining of CD80 (PB), EpCAM (APC), CD45 (APC/Cy7) and BF/PLA/EpCAM overlay (merged). Scale bar 7μM.

## Aire oligomerization PLA

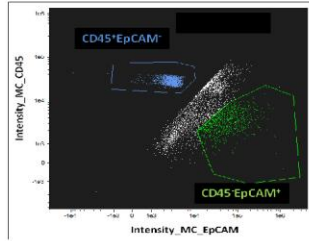

Intensity\_MC\_EpCAM, Intensity\_MC\_CD45

| Population   | Count | %Gated | Objects/mL | Mean     | Median   | Std. Dev.                             |
|--------------|-------|--------|------------|----------|----------|---------------------------------------|
| All          | 8330  | 100    | 832963.88  | 27180.94 | 16110.17 | 7529.54, 15866.69, 58788.06, 13118.81 |
| CD45- EpCAM+ | 1444  | 17.3   | 109724.74  | 89914.94 | 3631.01  | 57577.59, 3062.96, 105038.88, 2200.89 |
| CD45+        | 2811  | 33.7   | 213569.5   | 3025.91  | 27870.23 | 3067.51, 27248.25, 963.73, 4480.69    |

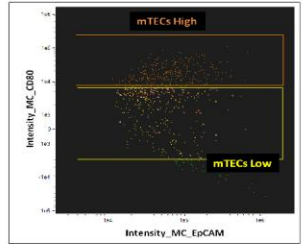

Intensity\_MC\_EpCAM, Intensity\_MC\_CD80

| Population                | Count | %Gated | Mean     | Median   | Std. Dev.                              |
|---------------------------|-------|--------|----------|----------|----------------------------------------|
| CD45- EpCAM+              | 1444  | 100    | 89914.94 | 11238.69 | 57577.59, 6272.19, 105038.88, 17186.92 |
| mTecs Low & CD45- EpCAM+  | 634   | 43.9   | 64076.2  | 2183.45  | 42083.68, 2177.69, 66277.19, 2506.37   |
| mTecs High & CD45- EpCAM+ | 631   | 43.7   | 91860.49 | 23975.18 | 65140.68, 17580.45, 87130.32, 18323.91 |

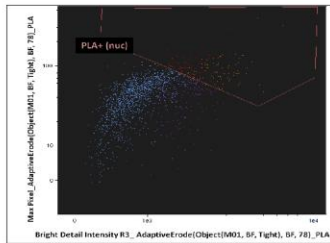

| Population                     | Count | %Gated |
|--------------------------------|-------|--------|
| CD45+                          | 2811  | 100    |
| PLA+ (nuc) & CD45+             | 135   | 4.8    |
| mTecs High & CD45- EpCAM+      | 631   | 100    |
| PLA+ (nuc) & mTecs High & C... | 179   | 28.4   |

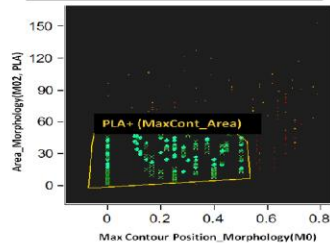

| Population                     | Count | %Gated |
|--------------------------------|-------|--------|
| PLA+ (nuc) & mTecs High & C... | 179   | 100    |
| PLA+ (MaxCont_Area) & PLA...   | 109   | 60.9   |
| PLA+ (nuc) & CD45+             | 135   | 100    |
| PLA+ (MaxCont_Area) & PLA...   | 105   | 77.8   |

## Mouse MINUS and Mouse PLUS Probes only

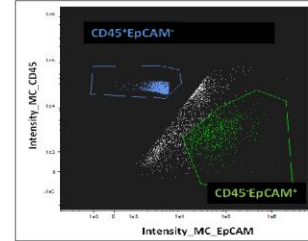

Intensity\_MC\_EpCAM, Intensity\_MC\_CD45

| Population   | Count | %Gated | Objects/mL | Mean     | Median   | Std. Dev.                             |
|--------------|-------|--------|------------|----------|----------|---------------------------------------|
| All          | 6439  | 100    | 961839.1   | 31043.11 | 14913.39 | 5512.62, 17989.6, 73703.27, 11902.94  |
| CD45- EpCAM+ | 1432  | 22.2   | 124950.08  | 97358.21 | 2977.84  | 58294.13, 2560.23, 118364.19, 1922.93 |
| CD45+        | 2672  | 41.5   | 233147.08  | 3744.19  | 25087.34 | 3835.14, 24539.59, 1142.53, 4188.75   |

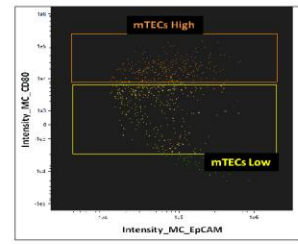

Intensity\_MC\_EpCAM, Intensity\_MC\_CD80

| Population                | Count | %Gated | Mean     | Median   | Std. Dev.                              |
|---------------------------|-------|--------|----------|----------|----------------------------------------|
| CD45- EpCAM+              | 1432  | 100    | 97358.21 | 11387.95 | 58294.13, 6467.92, 118364.19, 19084.06 |
| mTecs Low & CD45- EpCAM+  | 594   | 41.5   | 68715.93 | 2010.44  | 45189.23, 1965.76, 77022.44, 2426.83   |
| mTecs High & CD45- EpCAM+ | 655   | 45.7   | 90404.4  | 23652.08 | 60632.7, 17463.9, 92717.74, 19638.86   |

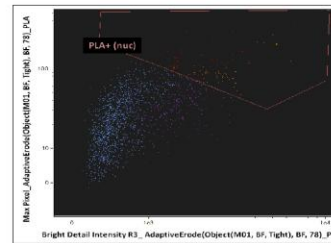

| Population                     | Count | %Gated |
|--------------------------------|-------|--------|
| CD45+                          | 2672  | 100    |
| PLA+ (nuc) & CD45+             | 103   | 3.85   |
| mTecs High & CD45- EpCAM+      | 655   | 100    |
| PLA+ (nuc) & mTecs High & C... | 117   | 17.9   |

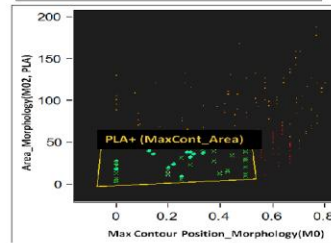

| Population                     | Count | %Gated |
|--------------------------------|-------|--------|
| PLA+ (nuc) & mTecs High & C... | 117   | 100    |
| PLA+ (MaxCont_Area) & PLA...   | 25    | 21.4   |
| PLA+ (nuc) & CD45+             | 103   | 100    |
| PLA+ (MaxCont_Area) & PLA...   | 40    | 38.8   |

## Supplementary Figure 4

### Gating strategy for PLIC positive signal of Aire oligomerization compared to probes only sample

Representative dot-plot graphs of WT and probes only samples of Aire oligomerization PLIC analysis (using the IDEAS 6.2 ImageStream software). Initial gating was done for CD45<sup>+</sup>Epcam<sup>-</sup> (CD45) and Epcam<sup>+</sup>CD45<sup>-</sup> (TECs) populations (first panel) then sub-gating for mTEC<sup>hi</sup> (CD80<sup>high</sup>) and mTEC<sup>lo</sup> (CD80<sup>low</sup>) populations (second panel). CD45 and mTEC<sup>hi</sup> populations were further gated for PLIC<sup>+</sup> signal (PLA+ (nuc), third panel). Further gating was done according to signal localization (nuclear) in order to reduce the percentage of false positive interactions detected (PLA+(MaxCont\_Area), fourth panel).

**a**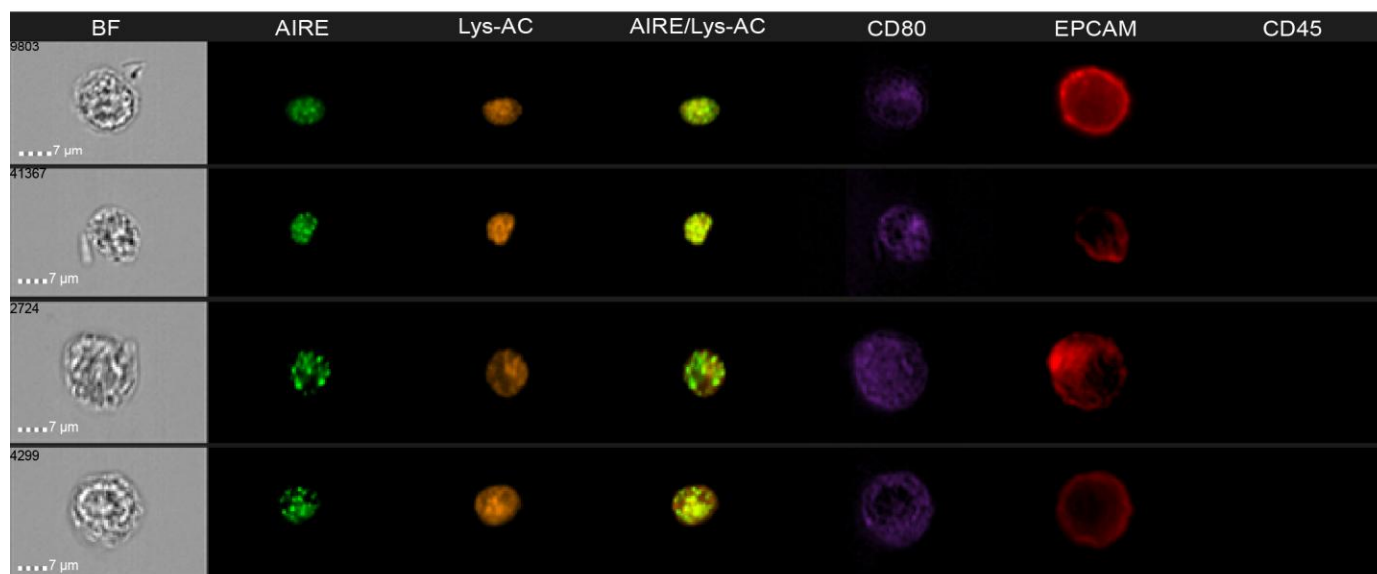**b**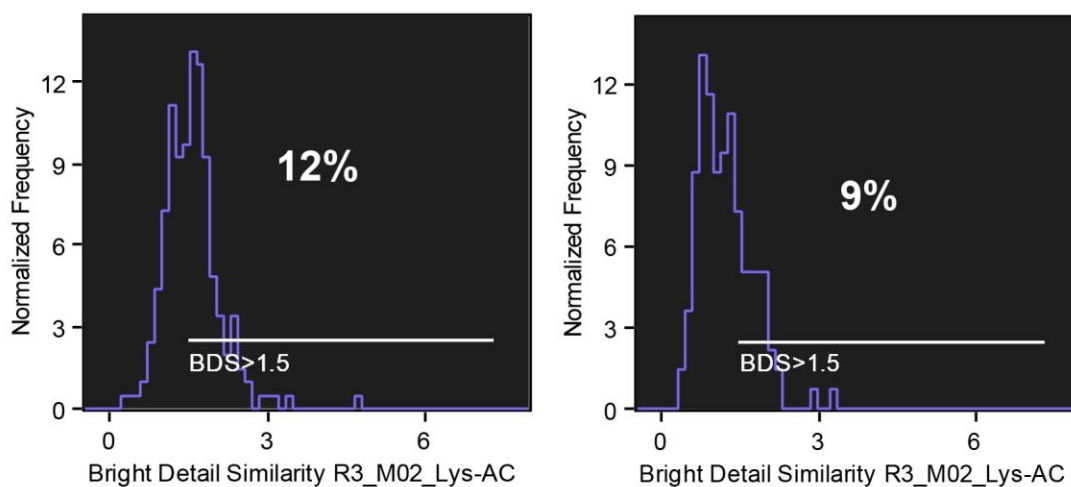**Supplementary Figure 5****Co-localization analysis of Aire and lysine acetylation in mTECs**

(a) Representative images of Aire and lysine-acetylation staining in mTEC<sup>hi</sup>, presented as (left to right): bright field (BF), staining of Aire (FITC), lysine-acetylation (AF555), Aire/lysine-acetylation overlay (merged), CD80 (PB), EpCAM (APC) and CD45 (APC/Cy7). Scale bar 7 μM. (b) Imaging flow cytometry analyzing the co-localization of Aire and lysine acetylation in mTEC<sup>hi</sup> based on bright detail similarity (BDS) feature (see methods for detailed explanation). Positive co-localization is considered as BDS>1.5 (2 independent experiments, n=1).
